# Supplementary figures and images for: Construction of a high density genetic map and QTL mapping of PEG-induced drought tolerance at the early seedling stage in sesame using whole genome re-sequencing
Source: Research Square preprint supplement (doi:10.21203/rs.3.rs-50720/v2), 2020-10-14

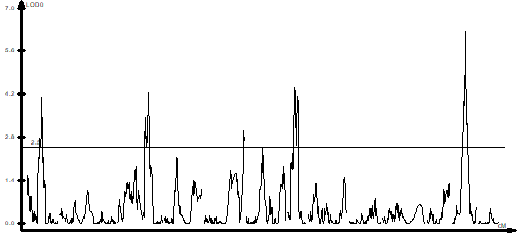

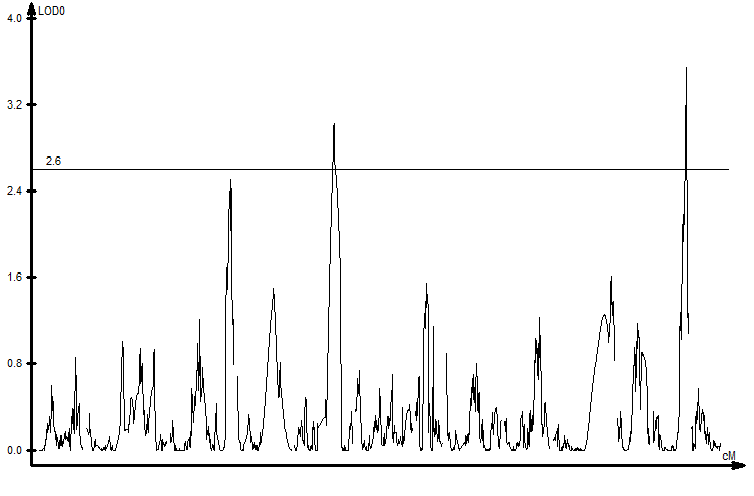

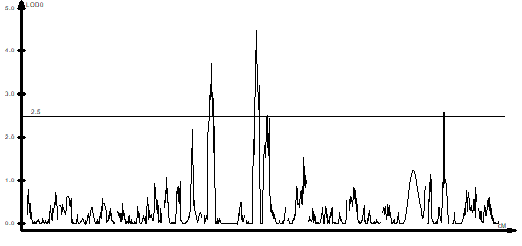

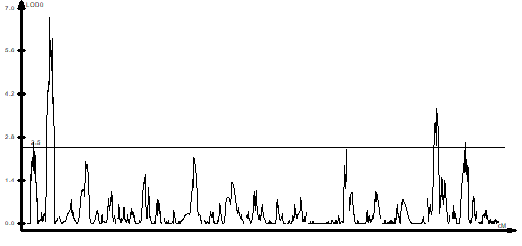
Supplemental Figure S1:

RSL2019

RRL2019

RSL2018

RSW2018

RSW2019

RRL2018


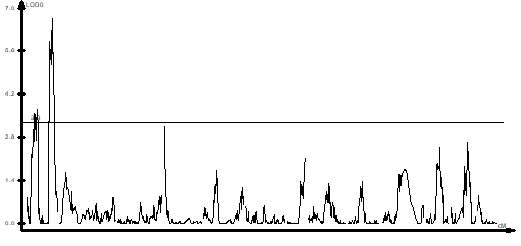

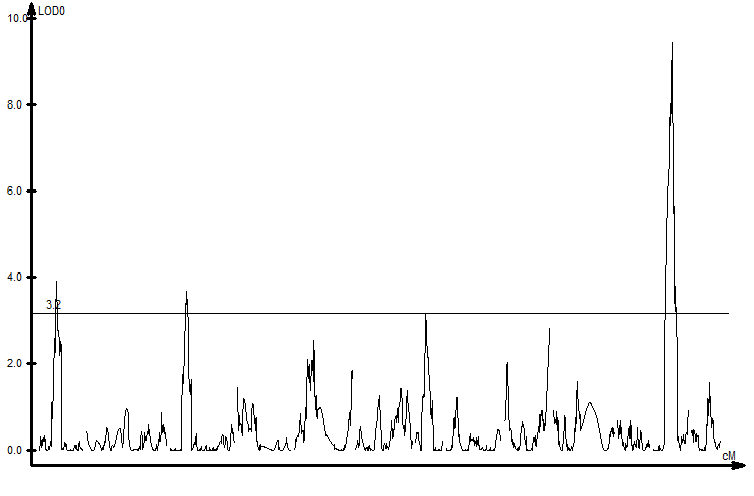

Supplement: Supplementary file 1 [file d8a873703d90f1760a426834.docx]
